# Supplementary material
Source: publisher figshare collection journal article supplement (https://frontiersin.figshare.com/ndownloader/files/17888114)
Supplement: Supplementary file [file 17888114]

Supplementary Table. 1 Search Strategies

Search included: PUBMED, EMBASE: search date was from the inception through April 2019

1) Pubmed search strategy

|                                                  |
|--------------------------------------------------|
| 1. "stroke"[Mesh]                                |
| 2. Brain Ischemia [Title/Abstract]               |
| 3. Brain infarction [Title/Abstract]             |
| 4. cerebral infarction [Title/Abstract]          |
| 5. intracerebral hemorrhage [Title/Abstract]     |
| 6. intracranial hemorrhage [Title/Abstract]      |
| 7. 1 OR 2 OR 3 OR 4 OR 5 OR 6                    |
| 8. "neutrophil"[MeSH Terms]                      |
| 9. "lymphocyte"[MeSH Terms]                      |
| 10. "neutrophil to lymphocyte ratio"[All Fields] |
| 11. "NLR"[All Fields]                            |
| 12. 8 OR 9 OR 10 OR 11                           |
| 13. "Survival"[Mesh]                             |
| 14. "Mortality"[Mesh]                            |
| 15. "Prognosis"[Mesh]                            |
| 16. Prognos*[Title/Abstract]                     |
| 17. outcome*[Title/Abstract]                     |
| 18. survival [Title/Abstract]                    |
| 19. mortality [Title/Abstract]                   |
| 20. predict*[Title/Abstract]                     |
| 21. 13 OR 14 OR 15 OR 16 OR 17 OR 18 OR 19 OR 20 |
| 22. 7 AND 12 AND 21                              |

2) Embase search strategy

|                                                              |
|--------------------------------------------------------------|
| 1. 'stroke'/exp                                              |
| 2. Brain Ischemia:ab,ti                                      |
| 3. Brain infarction:ab,ti                                    |
| 4. cerebral infarction:ab,ti                                 |
| 5. intracerebral hemorrhage:ab,ti                            |
| 6. intracranial hemorrhage:ab,ti                             |
| 7. 1 OR 2 OR 3 OR 4 OR 5 OR 6                                |
| 8. neutrophil to lymphocyte ratio'/exp                       |
| 9. neutrophil to lymphocyte ratio                            |
| 10. neutrophil to lymphocyte ratio: ab, ti                   |
| 11. neutrophil: ab, ti                                       |
| 12. lymphocyte: ab, ti                                       |
| 13. NLR: ab, ti                                              |
| 14. 8 OR 9 OR 10 OR 11 OR 12 OR 13                           |
| 15. 'prognosis'/exp                                          |
| 16. 'survival'/exp                                           |
| 17. 'mortality'/exp                                          |
| 18. prognos*: ab, ti                                         |
| 19. outcome*: ab, ti                                         |
| 20. survival: ab, ti                                         |
| 21. treatment: ab, ti                                        |
| 22. mortality': ab, ti                                       |
| 23. recurren*: ab, ti                                        |
| 24. predict*: ab, ti                                         |
| 25. 15 OR 16 OR 17 OR 18 OR 19 OR 20 OR 21 OR 22 OR 23 OR 24 |
| 26. 7 AND 14 AND 25                                          |

**Supplementary Table. 2** Subgroup analyses of the associations between NLR and risk of ischemic stroke.

| Stratified analyses                     | No. of patient | No. of | Model  | Pooled HR (95%CI)       | P value | P <sub>D</sub> value | Heterogeneity  |                      |
|-----------------------------------------|----------------|--------|--------|-------------------------|---------|----------------------|----------------|----------------------|
|                                         |                |        |        |                         |         |                      | I <sup>2</sup> | P <sub>H</sub> value |
| Clinical characteristic                 |                |        |        |                         |         |                      |                |                      |
| Ischemic stroke subtypes*               |                |        |        |                         |         | <0.001               |                |                      |
| Mixed                                   | 2083           | 3      | random | 1.856 (1.169-2.948)     | 0.009   |                      | 94.4%          | <0.001               |
| Atherosclerotic stroke                  | 292            | 2      | fixed  | 7.985 (4.070-15.667)    | <0.001  |                      | 0.0%           | 0.874                |
| Cardioembolic stroke                    | 32912          | 1      | random | 1.520 (1.261-1.832)     | <0.001  |                      |                |                      |
| Cerebral venous sinus thrombosis (CVST) | 80             | 1      | random | 1.442 (1.086-1.915)     | 0.011   |                      |                |                      |
| Demographic factors                     |                |        |        |                         |         |                      |                |                      |
| Age                                     |                |        |        |                         |         | <0.001               |                |                      |
| < 65                                    | 470            | 4      | random | 2.542 (1.482-4.357)     | 0.001   |                      | 89.7%          | <0.001               |
| ≥ 65                                    | 34897          | 3      | random | 1.872 (1.109-3.160)     | 0.019   |                      | 95.4%          | <0.001               |
| Gender distribution                     |                |        |        |                         |         | <0.001               |                |                      |
| Female dominant                         | 2315           | 4      | random | 1.842 (1.229-2.760)     | 0.003   |                      | 91.8%          | <0.001               |
| Balanced                                | 60             | 1      | random | 46.820 (14.429-151.927) | <0.001  |                      |                |                      |
| Male dominant                           | 32992          | 2      | fixed  | 1.496 (1.280-1.748)     | <0.001  |                      | 0.0%           | 0.761                |
| Country                                 |                |        |        |                         |         | <0.001               |                |                      |
| Eastern                                 | 2083           | 3      | random | 1.856 (1.169-2.948)     | 0.009   |                      | 94.4%          | <0.001               |
| Western                                 | 33284          | 4      | random | 2.578 (1.439-4.617)     | 0.001   |                      | 86.7%          | <0.001               |
| Vascular risk factors                   |                |        |        |                         |         |                      |                |                      |
| Presence of hypertension                |                |        |        |                         |         | <0.001               |                |                      |
| ≥ 65% and <75%                          | 34703          | 3      | random | 2.312 (1.238-4.321)     | 0.009   |                      | 96.4%          | <0.001               |
| ≥ 75%                                   | 546            | 2      | random | 2.156 (1.204-3.861)     | 0.010   |                      | 89.6%          | <0.001               |
| Presence of diabetes mellitus           |                |        |        |                         |         | <0.001               |                |                      |
| ≥ 25%                                   | 35189          | 4      | random | 1.942 (1.371-2.752)     | <0.001  |                      | 94.1%          | <0.001               |
| Presence of hyperlipidemia              |                |        |        |                         |         | 0.010                |                |                      |
| ≥ 25%                                   | 546            | 2      | random | 2.156 (1.204-3.861)     | 0.010   |                      | 89.6%          | <0.001               |
| Presence of current smoking             |                |        |        |                         |         | 0.002                |                |                      |
| < 35%                                   | 584            | 3      | random | 4.145 (0.975-17.621)    | 0.054   |                      | 91.7%          | <0.001               |
| ≥ 35%                                   | 2023           | 2      | random | 1.047 (1.011-1.084)     | 0.010   |                      | 74.5%          | 0.020                |
| Methodological factors                  |                |        |        |                         |         |                      |                |                      |
| Sample-time <sup>&amp;</sup>            |                |        |        |                         |         | 0.001                |                |                      |
| on admission                            | 33030          | 3      | random | 1.600 (1.150-2.226)     | 0.005   |                      | 60.7%          | 0.078                |
| within 24 hours                         | 292            | 1      | random | 1.499 (1.161-1.935)     | 0.002   |                      |                |                      |
| more than 24 hours                      | 2277           | 3      | random | 1.797 (1.065-3.034)     | 0.028   |                      | 94.1%          | <0.001               |
| Cut-off value                           |                |        |        |                         |         | <0.001               |                |                      |
| < 4                                     | 35367          | 7      | random | 1.906 (1.427-2.546)     | <0.001  |                      | 93.9%          | <0.001               |
| Definition of cut-off value             |                |        |        |                         |         | <0.001               |                |                      |
| ROC curve analysis                      | 2455           | 6      | random | 2.795 (1.685-4.636)     | <0.001  |                      | 94.2%          | <0.001               |
| 4th quartile                            | 32912          | 1      | random | 1.520 (1.261-1.832)     | <0.001  |                      |                |                      |
| continuous variable                     | 33204          | 2      | random | 1.235 (0.891-1.713)     | 0.205   |                      | 84.8%          | 0.010                |
| HR calculation <sup>‡</sup>             |                |        |        |                         |         | <0.001               |                |                      |
| Multivariate                            | 33576          | 5      | random | 1.802 (1.349-2.406)     | <0.001  |                      | 79.5%          | <0.001               |
| Univariate                              | 1791           | 2      | random | 6.655 (0.160-277.341)   | 0.319   |                      | 97.5%          | <0.001               |

\*: This system of categorizing stroke was based on the multicenter Trial of Org 10172 in Acute Stroke Treatment (TOAST).  
^: Risk of ischemic stroke was defined as atherosclerotic or lacunar or cardioembolic or cryptogenic stroke.  
#: Onset-time was defined as time from stroke onset to recruitment/admission/diagnosis.  
&: Sample-time was defined as time from stroke onset to take blood sample.  
‡: HRs were extracted from multivariate cox proportional hazards models, univariate cox proportional hazards models or survival curve analysis.

**Supplementary Table. 3** Quality assessment of eligible studies

| No. | Authors (Ref.) *       | Representati<br>veness of<br>population | Non-<br>exposed<br>cohort | Ascertainment of<br>exposure | Outcome<br>present at<br>start of study | Appropriate<br>confounding<br>measurement<br>and account | Sufficient<br>measurement of<br>outcomes | Completeness of<br>follow-up |
|-----|------------------------|-----------------------------------------|---------------------------|------------------------------|-----------------------------------------|----------------------------------------------------------|------------------------------------------|------------------------------|
| 1   | Park et al 2010        | 1                                       | 0                         | 0                            | 2                                       | 2                                                        | 2                                        | 0                            |
| 2   | Tokgoz et al 2013      | 2                                       | 0                         | 0                            | 2                                       | 2                                                        | 2                                        | 1                            |
| 3   | Akil et al 2014        | 1                                       | 0                         | 0                            | 2                                       | 2                                                        | 2                                        | 2                            |
| 4   | Brooks et al 2014      | 1                                       | 0                         | 0                            | 2                                       | 1                                                        | 2                                        | 1                            |
| 5   | Gao et al 2014         | 1                                       | 0                         | 0                            | 2                                       | 1                                                        | 2                                        | 0                            |
| 6   | Tokgoz et al 2014      | 2                                       | 0                         | 0                            | 1                                       | 2                                                        | 2                                        | 1                            |
| 7   | Maestrini et al 2015   | 2                                       | 0                         | 0                            | 2                                       | 2                                                        | 2                                        | 1                            |
| 8   | Saliba et al 2015      | 1                                       | 0                         | 0                            | 2                                       | 1                                                        | 2                                        | 2                            |
| 9   | Zhao et al 2015        | 2                                       | 0                         | 0                            | 2                                       | 2                                                        | 2                                        | 0                            |
| 10  | Guo et al 2016         | 2                                       | 0                         | 0                            | 2                                       | 2                                                        | 2                                        | 0                            |
| 11  | Kim et al 2016         | 1                                       | 0                         | 0                            | 2                                       | 1                                                        | 2                                        | 0                            |
| 12  | Köklü et al 2016       | 2                                       | 0                         | 0                            | 2                                       | 2                                                        | 2                                        | 2                            |
| 13  | Lattanzi et al 2016    | 2                                       | 0                         | 0                            | 2                                       | 2                                                        | 2                                        | 0                            |
| 14  | Wang et al 2016        | 1                                       | 0                         | 0                            | 2                                       | 1                                                        | 2                                        | 0                            |
| 15  | Tao et al 2016         | 1                                       | 0                         | 0                            | 2                                       | 1                                                        | 2                                        | 0                            |
| 16  | Akboga et al 2017      | 1                                       | 0                         | 0                            | 2                                       | 1                                                        | 2                                        | 0                            |
| 17  | Fan et al 2017         | 1                                       | 0                         | 0                            | 2                                       | 2                                                        | 2                                        | 2                            |
| 18  | Fang et al 2017        | 1                                       | 0                         | 0                            | 2                                       | 1                                                        | 2                                        | 0                            |
| 19  | Giede-Jeppe et al 2017 | 1                                       | 0                         | 0                            | 2                                       | 1                                                        | 2                                        | 0                            |
| 20  | Huang et al 2017       | 1                                       | 0                         | 0                            | 2                                       | 1                                                        | 2                                        | 0                            |
| 21  | Lattanzi et al 2017    | 2                                       | 0                         | 0                            | 2                                       | 2                                                        | 2                                        | 0                            |
| 22  | Qun et al 2017         | 1                                       | 0                         | 0                            | 2                                       | 1                                                        | 2                                        | 1                            |
| 23  | Sun Y et al 2017       | 1                                       | 0                         | 0                            | 2                                       | 1                                                        | 2                                        | 1                            |
| 24  | Tao et al 2017         | 1                                       | 0                         | 0                            | 2                                       | 1                                                        | 2                                        | 1                            |
| 25  | Xue et al 2017         | 2                                       | 0                         | 0                            | 2                                       | 2                                                        | 2                                        | 2                            |
| 26  | Yilmaz et al 2017      | 1                                       | 0                         | 0                            | 2                                       | 1                                                        | 2                                        | 0                            |
| 27  | Zhai et al 2017        | 1                                       | 0                         | 0                            | 2                                       | 2                                                        | 2                                        | 1                            |
| 28  | Lattanzi et al 2018    | 2                                       | 0                         | 0                            | 2                                       | 2                                                        | 2                                        | 1                            |
| 29  | Wang F et al 2018      | 1                                       | 0                         | 0                            | 2                                       | 1                                                        | 2                                        | 0                            |
| 30  | Nam et al 2018         | 2                                       | 0                         | 0                            | 2                                       | 2                                                        | 2                                        | 0                            |
| 31  | Shi et al 2018         | 1                                       | 0                         | 0                            | 2                                       | 1                                                        | 2                                        | 0                            |
| 32  | Yu et al 2018          | 2                                       | 0                         | 0                            | 2                                       | 2                                                        | 2                                        | 0                            |
| 33  | Kocaturk et al 2018    | 2                                       | 0                         | 0                            | 2                                       | 2                                                        | 2                                        | 1                            |
| 34  | Lim et al 2018         | 2                                       | 0                         | 0                            | 2                                       | 2                                                        | 2                                        | 1                            |
| 35  | Wang L et al 2018      | 1                                       | 1                         | 0                            | 2                                       | 1                                                        | 2                                        | 2                            |
| 36  | Giede-Jeppe et al 2019 | 2                                       | 0                         | 0                            | 2                                       | 1                                                        | 2                                        | 2                            |
| 37  | Qin et al 2019         | 2                                       | 0                         | 0                            | 2                                       | 2                                                        | 2                                        | 0                            |

Adequate assessment included 1) representativeness of population: “source population clearly defined” and “study population described” or “study population represents source population or population of interest”; 2) completeness of follow-up: “completeness of follow-up adequate”; 3) non exposed cohort: Drawn from the same community as the exposed cohort; 4) sufficient measurement of outcomes: “outcome measured appropriately”; 5) appropriate confounding measurement and account: “confounders defined and measured” and “confounding accounted for”; and 6) outcome of interest was not present at start of study

\*References as described in manuscript

**Supplementary Table. 4** Sensitivity analysis using a “one-study removed” model for functional outcome in ischemic stroke.

| Sensitivity analysis           | Heterogeneity test (I <sup>2</sup> ) | Pooled HR (95%CI)    |
|--------------------------------|--------------------------------------|----------------------|
| All studies                    | 89.9%                                | 1.756 (1.395, 2.209) |
| Excluding Maestrini et al 2015 | 79.7%                                | 1.963 (1.526, 2.524) |

**Supplementary Table. 5** Publication bias assessment with different tests for mortality and functional outcome in ischemic stroke.

| Publication bias          | Begg’s P value | Egger’s P value | T&F(Fill) method analysis |                      | Model  |
|---------------------------|----------------|-----------------|---------------------------|----------------------|--------|
|                           |                |                 | Before                    | After                |        |
| Mortality subset          | 0.246          | 0.096           | -                         | -                    | -      |
| Functional outcome subset | 0.743          | 0.000           | 1.756 (1.395, 2.209)      | 1.088 (0.869, 1.361) | random |

Abbreviations: CI= confidence interval; Fill=number of studies added by trim and fill method; het= heterogeneity; HR=hazard ratio; T&F=result of trimmed and filled analysis, using assumption of random effects.

**Supplementary Table. 6** Publication bias assessment with different tests for mortality and functional outcome in hemorrhagic stroke.

| Publication bias          | Begg’s P value | Egger’s P value | T&F(Fill) method analysis |                      | Model  |
|---------------------------|----------------|-----------------|---------------------------|----------------------|--------|
|                           |                |                 | Before                    | After                |        |
| Mortality subset          | 0.026          | 0.003           | 1.089 (1.026, 1.157)      | 1.027 (0.957, 1.102) | random |
| Functional outcome subset | 0.308          | 0.370           | -                         | -                    | -      |

Abbreviations: CI= confidence interval; Fill=number of studies added by trim and fill method; het= heterogeneity; HR=hazard ratio; T&F=result of trimmed and filled analysis, using assumption of random effects.

Supplementary figures

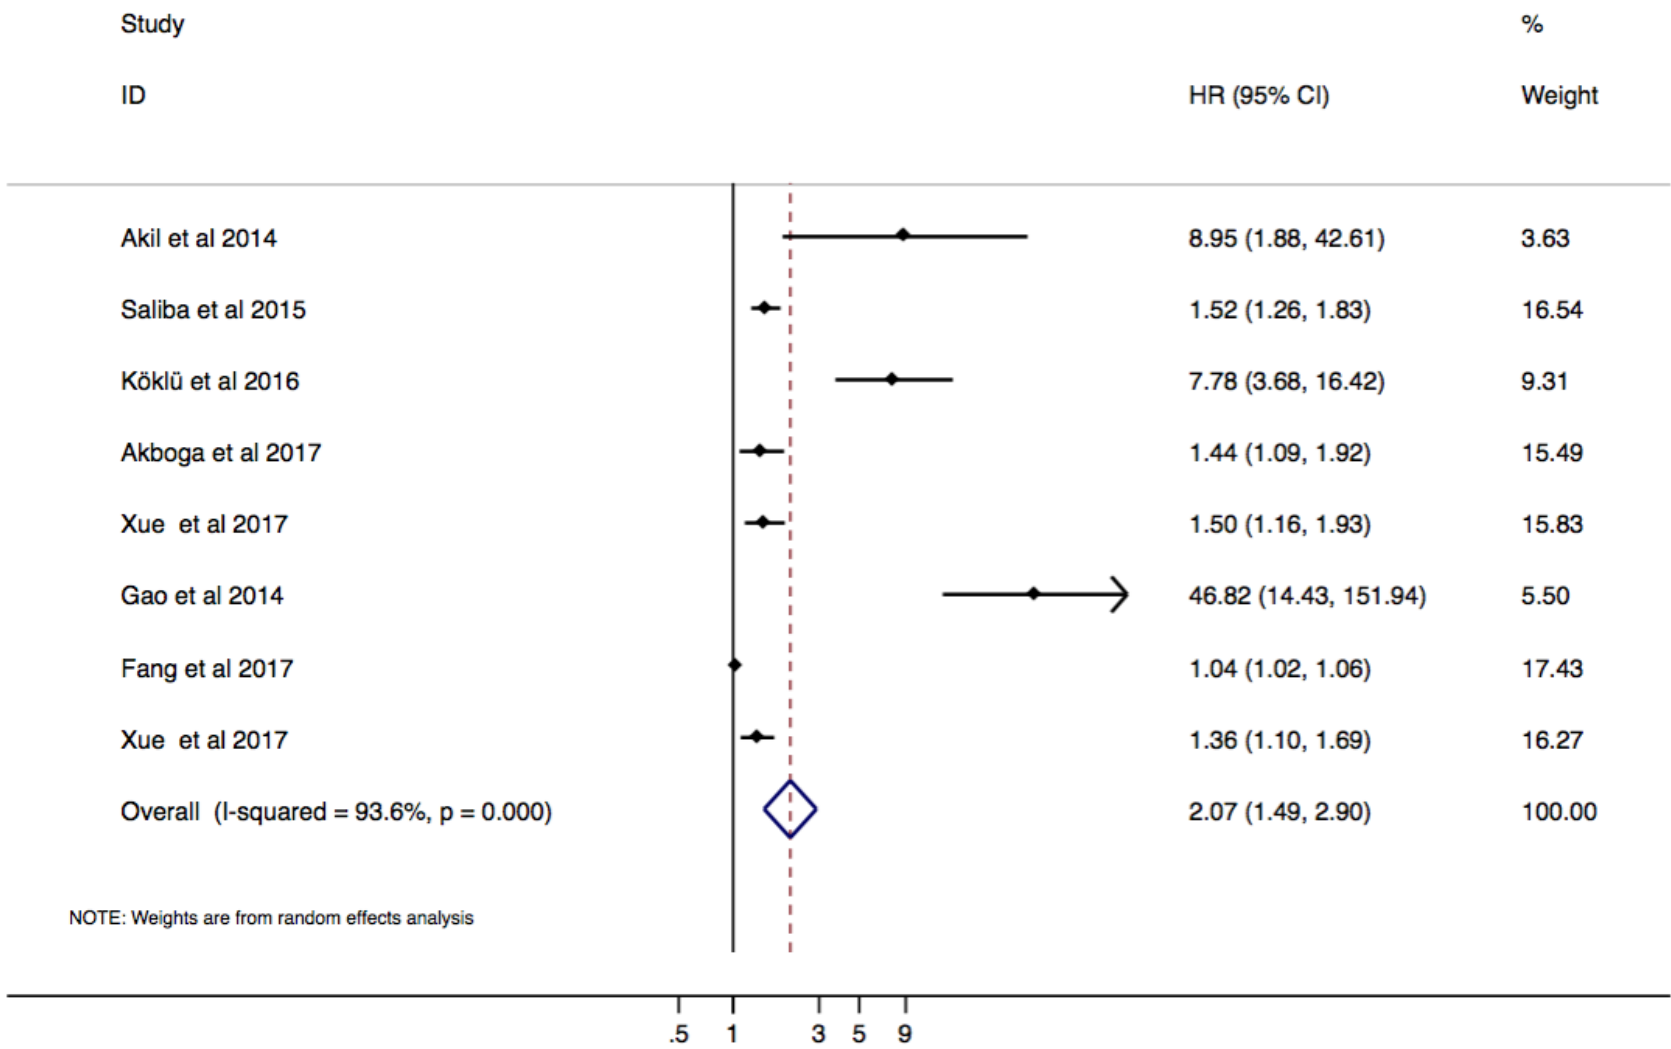

Fig. 1. Meta-analysis of the association between NLR and ischemic stroke incidence in patients. Results are presented as individual and pooled risk ratios (RRs) with 95% confidence intervals (CIs).

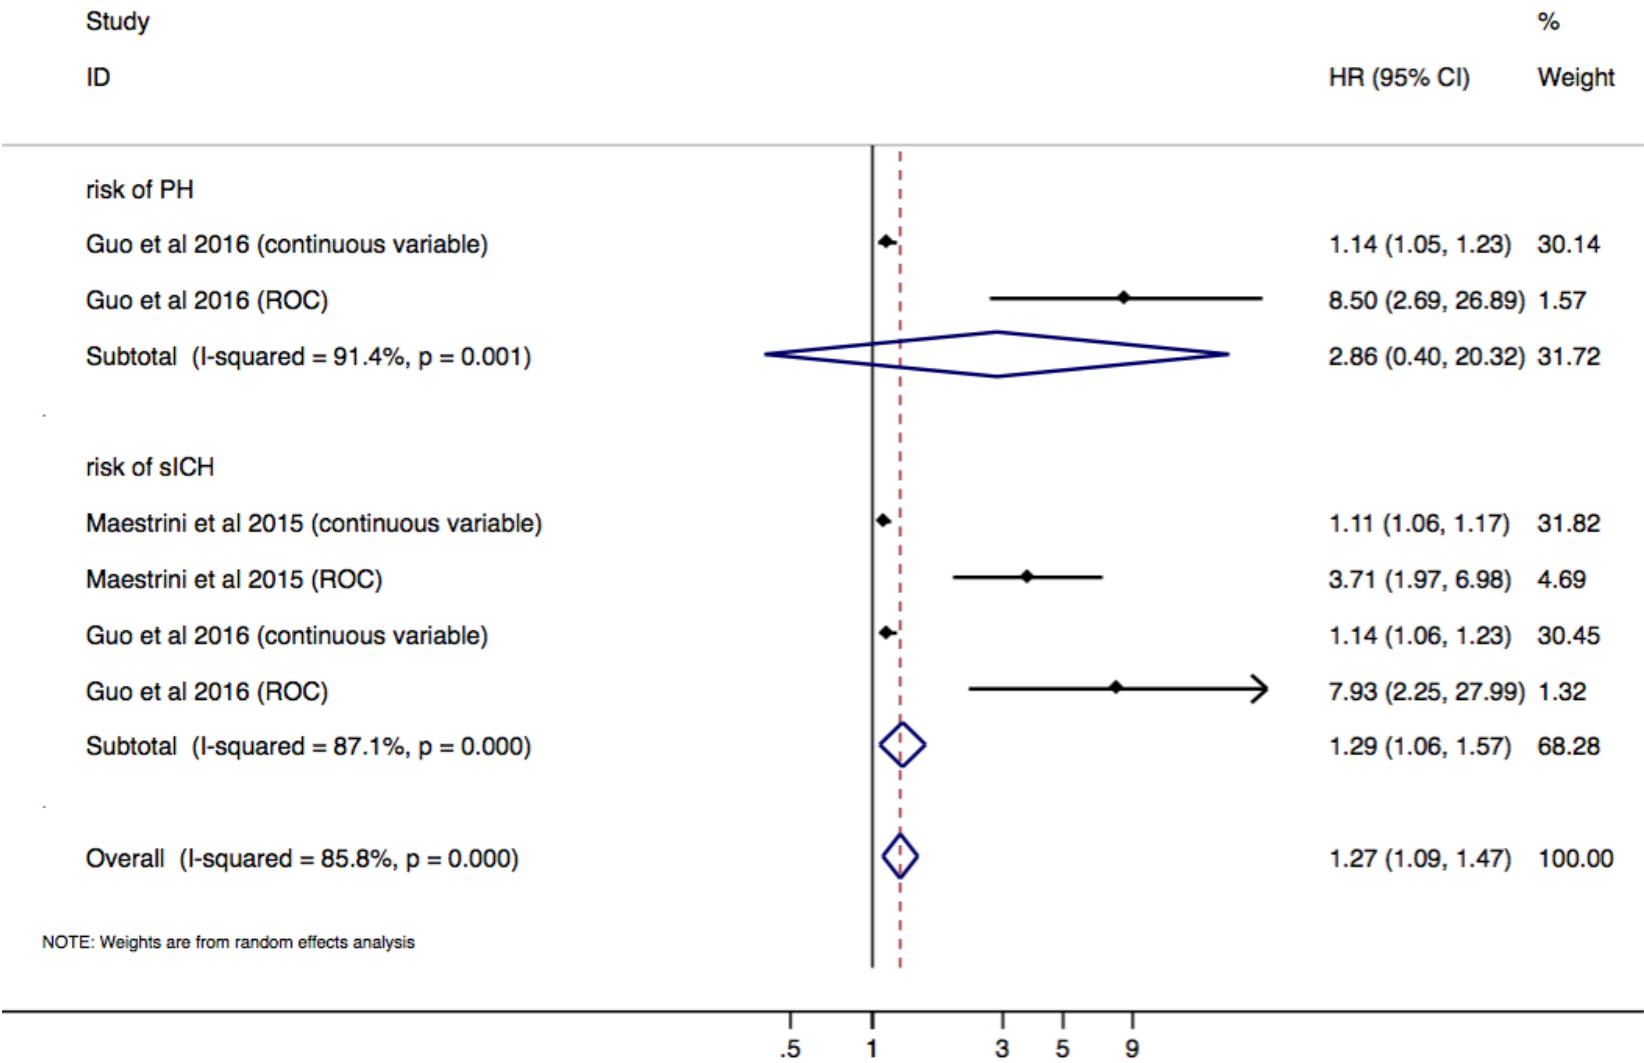

Fig. 2. Meta-analysis of the association between NLR and ischemic stroke complication incidence in patients. Results are presented as individual and pooled risk ratios (RRs) with 95% confidence intervals (CIs).

PRISMA checklist

| Section/topic                      | #  | Checklist item                                                                                                                                                                                                                                                                                              | Reported on page # |
|------------------------------------|----|-------------------------------------------------------------------------------------------------------------------------------------------------------------------------------------------------------------------------------------------------------------------------------------------------------------|--------------------|
| TITLE                              |    |                                                                                                                                                                                                                                                                                                             |                    |
| Title                              | 1  | Identify the report as a systematic review, meta-analysis, or both.                                                                                                                                                                                                                                         | Page 1             |
| ABSTRACT                           |    |                                                                                                                                                                                                                                                                                                             |                    |
| Structured summary                 | 2  | Provide a structured summary including, as applicable: background; objectives; data sources; study eligibility criteria, participants, and interventions; study appraisal and synthesis methods; results; limitations; conclusions and implications of key findings; systematic review registration number. | Page 1             |
| INTRODUCTION                       |    |                                                                                                                                                                                                                                                                                                             |                    |
| Rationale                          | 3  | Describe the rationale for the review in the context of what is already known.                                                                                                                                                                                                                              | Page 3             |
| Objectives                         | 4  | Provide an explicit statement of questions being addressed with reference to participants, interventions, comparisons, outcomes, and study design (PICOS).                                                                                                                                                  | Page 5             |
| METHODS                            |    |                                                                                                                                                                                                                                                                                                             |                    |
| Protocol and registration          | 5  | Indicate if a review protocol exists, if and where it can be accessed (e.g., Web address), and, if available, provide registration information including registration number.                                                                                                                               | Page 4             |
| Eligibility criteria               | 6  | Specify study characteristics (e.g., PICOS, length of follow-up) and report characteristics (e.g., years considered, language, publication status) used as criteria for eligibility, giving rationale.                                                                                                      | Page 4             |
| Information sources                | 7  | Describe all information sources (e.g., databases with dates of coverage, contact with study authors to identify additional studies) in the search and date last searched.                                                                                                                                  | Page 4             |
| Search                             | 8  | Present full electronic search strategy for at least one database, including any limits used, such that it could be repeated.                                                                                                                                                                               | Page 4             |
| Study selection                    | 9  | State the process for selecting studies (i.e., screening, eligibility, included in systematic review, and, if applicable, included in the meta-analysis).                                                                                                                                                   | Page 4 &5          |
| Data collection process            | 10 | Describe method of data extraction from reports (e.g., piloted forms, independently, in duplicate) and any processes for obtaining and confirming data from investigators.                                                                                                                                  | Page 5             |
| Data items                         | 11 | List and define all variables for which data were sought (e.g., PICOS, funding sources) and any assumptions and simplifications made.                                                                                                                                                                       | Page 5             |
| Risk of bias in individual studies | 12 | Describe methods used for assessing risk of bias of individual studies (including specification of whether this was done at the study or outcome level), and how this information is to be used in any data synthesis.                                                                                      | Page 6             |
| Summary measures                   | 13 | State the principal summary measures (e.g., risk ratio, difference in means).                                                                                                                                                                                                                               | Page 6             |
| Synthesis of results               | 14 | Describe the methods of handling data and combining results of studies, if done, including measures of consistency (e.g., $I^2$ ) for each meta-analysis.                                                                                                                                                   | Page 6             |
